# Supplementary material for: Desulfurispira natronophila gen. nov. sp. nov.: an obligately anaerobic dissimilatory sulfur-reducing bacterium from soda lakes
Source: PubMed Central journal article supplement — Extremophiles. 2010 Apr 21;14(4):349–55. doi: 10.1007/s00792-010-0314-7 (PMC2898105; doi:10.1007/s00792-010-0314-7), 2010-04-21
Supplement: 792_2010_314_MOESM2_ESM.pdf [file 792_2010_314_MOESM2_ESM.pdf]

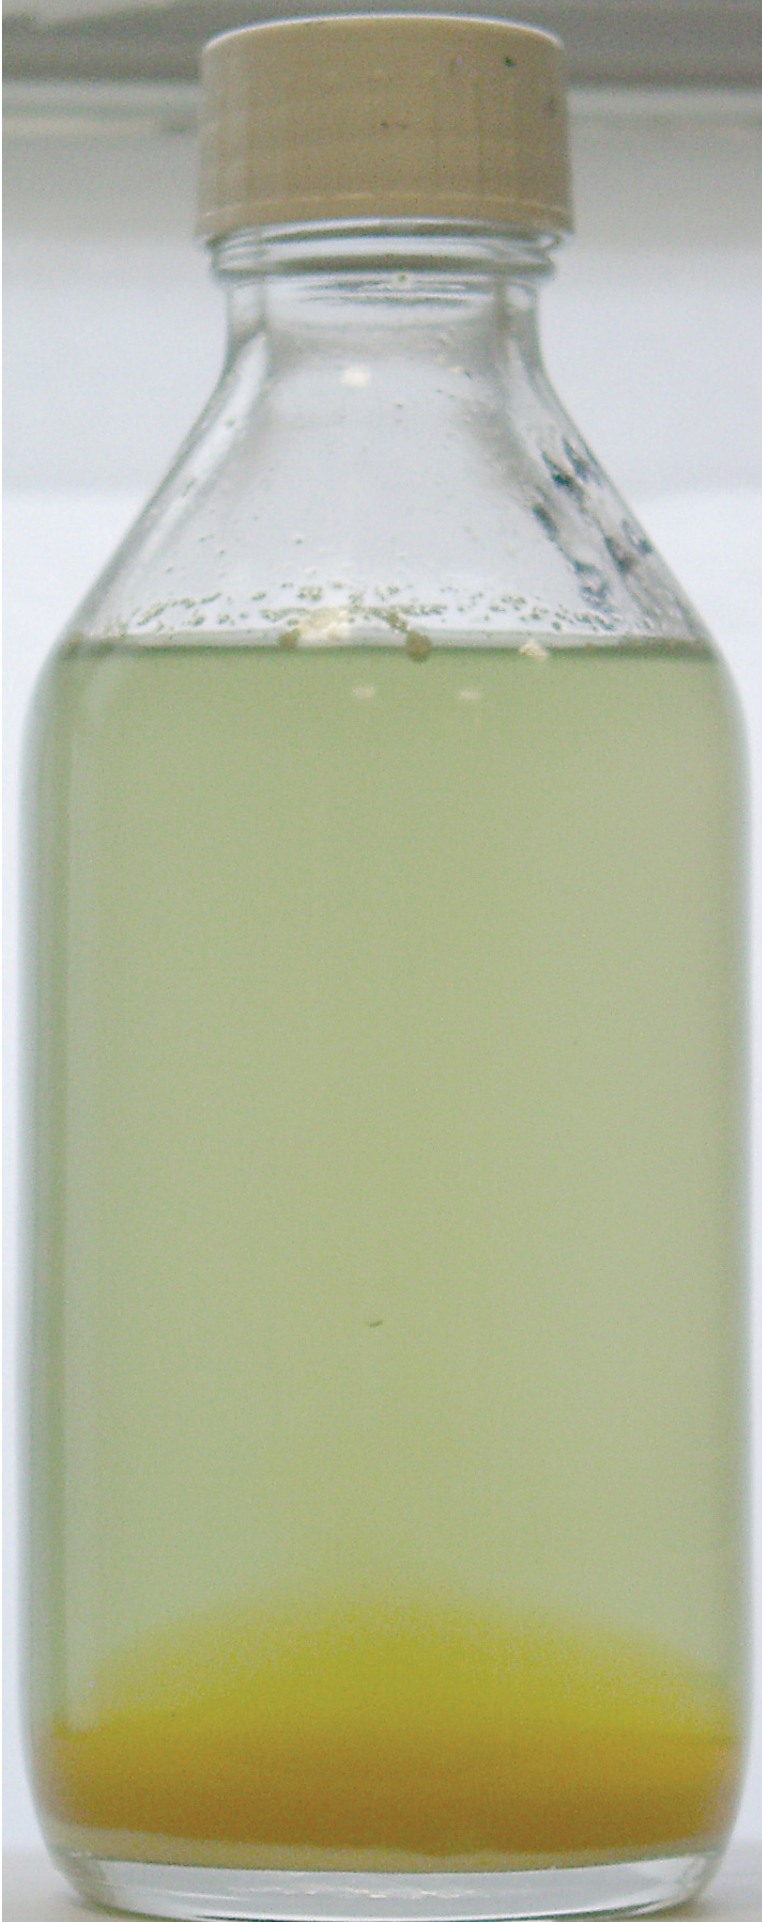

Supplementary Figure. Liquid culture of strain AHT11 with sulfur and acetate at pH 10 showing formation of intermediate yellow polysulfide above the layer of insoluble sulfur.
